# Supplementary material
Source: publisher site journal article supplement (https://www.dovepress.com/article/419551)
Supplement: Supplementary file 1 [file get_supplementary_file.php]

## Translated Bilingual Survey

| Codes                                     | Items                                                                                                                                         | 5<br>Always | 4<br>Often | 3<br>Sometimes | 2<br>Seldom   | 1<br>Never/Hardly<br>Ever |
|-------------------------------------------|-----------------------------------------------------------------------------------------------------------------------------------------------|-------------|------------|----------------|---------------|---------------------------|
|                                           | سوالات/مضامین                                                                                                                                 | ہمیشہ       | اکثر       | بعض اوقات      | کبھی<br>کبھار | کبھی نہیں/شاید<br>ہی کبھی |
| <b>Influence at Work (IN)</b>             |                                                                                                                                               |             |            |                |               |                           |
| کام پر اثر                                |                                                                                                                                               |             |            |                |               |                           |
| IN1                                       | Do you have a large degree of influence on the decisions concerning your work?<br>کیا آپ اپنے کام کے متعلق فیصلوں پر بڑی حد تک اثر رکھتے ہیں؟ |             |            |                |               |                           |
| IN2                                       | Do you have a say in choosing who you work with?<br>آپ کس کے ساتھ کام کرتے ہیں کیا اس کے انتخاب میں آپ کی کوئی رائے ہوتی ہے؟                  |             |            |                |               |                           |
| IN3                                       | Can you influence the amount of work assigned to you?<br>آپ کے ذمے لگائے جانے والے کام کی مقدار پر آپ اثر رکھتے ہیں؟                          |             |            |                |               |                           |
| IN4                                       | Do you have any influence on what you do at work?<br>اگر آپ دفتر میں کچھ کام کرتے ہیں، اس پر اثر رکھتے ہیں؟                                   |             |            |                |               |                           |
| IN5                                       | Can you influence how quickly you work?<br>کیا آپ اس کی استطاعت رکھتے ہیں کہ آپ کتنی تیزی سے کام کر لیتے ہیں؟                                 |             |            |                |               |                           |
| <b>Possibilities for Development (PD)</b> |                                                                                                                                               |             |            |                |               |                           |
| ترقی کے امکانات                           |                                                                                                                                               |             |            |                |               |                           |
| PD1                                       | Do you have the possibility of learning new things through your work?<br>کیا آپ کے پاس اپنے کام کے توسط سے کوئی نئی چیز سیکھنے کا امکان ہے؟   |             |            |                |               |                           |

|                                                                |                                                                                                                                                                                                                                                             |  |  |  |  |  |
|----------------------------------------------------------------|-------------------------------------------------------------------------------------------------------------------------------------------------------------------------------------------------------------------------------------------------------------|--|--|--|--|--|
| PD2                                                            | Can you use your skills or expertise in your work?<br>کیا آپ اپنے کام میں اپنی صلاحیت یا مہارت استعمال کر سکتے ہیں؟                                                                                                                                         |  |  |  |  |  |
| PD3                                                            | Does your work give you the opportunity to develop your skills?<br>کیا آپ کا کام آپ کو اپنی مہارتوں میں ترقی کا موقع فراہم کرتا ہے؟                                                                                                                         |  |  |  |  |  |
| <b>Variation of Work (VW)</b><br>کام میں تبدیلی                |                                                                                                                                                                                                                                                             |  |  |  |  |  |
| VW1                                                            | Is your work varied?<br>کیا آپ کا کام تبدیل ہوتا رہتا ہے؟                                                                                                                                                                                                   |  |  |  |  |  |
| VW2                                                            | Do you have to do the same thing over and over again?<br>کیا آپ کو ایک ہی کام بار بار کرنا پڑتا ہے؟                                                                                                                                                         |  |  |  |  |  |
| <b>Control Over Working Time (CT)</b><br>کام کے اوقات پر دسترس |                                                                                                                                                                                                                                                             |  |  |  |  |  |
| CT1                                                            | Can you decide when to take a break?<br>کیا آپ فیصلہ کرتے ہیں کہ کام میں وقفہ کب کرنا ہے؟                                                                                                                                                                   |  |  |  |  |  |
| CT2                                                            | Can you take holidays more or less when you wish?<br>کیا آپ جب چاہیں کم یا زیادہ چھٹیاں لے سکتے ہیں؟                                                                                                                                                        |  |  |  |  |  |
| CT3                                                            | Can you leave your work to have a chat with a colleague?<br>کیا آپ اپنے ہم کار (ساتھ کام کرنے والوں) کے ساتھ بات چیت کرنے کے لئے کام چھوڑ سکتے ہیں؟                                                                                                         |  |  |  |  |  |
| CT4                                                            | If you have some private business is it possible for you to leave your place of work for half an hour without special permission?<br>اگر آپ کو کوئی ذاتی کام ہو تو کیا یہ ممکن ہے کہ آپ خصوصی اجازت کے بغیر ادھ گھنٹے کے لئے اپنے کام کی جگہ چھوڑ سکتے ہوں؟ |  |  |  |  |  |
| CT5                                                            | Do you have to do overtime?<br>کیا آپ کو زائد وقت کے لئے کام کرنا پڑتا ہے؟                                                                                                                                                                                  |  |  |  |  |  |

| Meaning of Work (MW)                                                 |                                                                                                                                                                      |  |  |  |  |  |
|----------------------------------------------------------------------|----------------------------------------------------------------------------------------------------------------------------------------------------------------------|--|--|--|--|--|
| کام کا مفہوم                                                         |                                                                                                                                                                      |  |  |  |  |  |
| MW1                                                                  | Is your work meaningful?<br>کیا آپ کا کام مفید ہے؟                                                                                                                   |  |  |  |  |  |
| MW2                                                                  | Do you feel that the work you do is important?<br>کیا آپ محسوس کرتے ہیں کہ جو کام آپ کرتے ہیں وہ اہم ہے؟                                                             |  |  |  |  |  |
| <b>Sleeping Trouble (SL):</b> بے خوابی                               |                                                                                                                                                                      |  |  |  |  |  |
| These questions are about how you have been during the last 4 weeks. |                                                                                                                                                                      |  |  |  |  |  |
| یہ سوالات گزشتہ چار ہفتوں کے دورانیے میں آپ کی صحت کے حوالے سے ہیں۔  |                                                                                                                                                                      |  |  |  |  |  |
| ST1                                                                  | How often have you slept badly and restlessly?<br>آپ کتنی مرتبہ بے خوابی اور بے چینی کا شکار ہوئے؟                                                                   |  |  |  |  |  |
| ST2                                                                  | How often have you found it hard to go to sleep?<br>کتنی مرتبہ آپ کو سونے میں مشکل پیش آئی ہے؟                                                                       |  |  |  |  |  |
| ST3                                                                  | How often have you woken up too early and not been able to get back to sleep?<br>کتنی مرتبہ آپ بہت جلدی بیدار ہوئے ہیں اور دوبارہ سو نہ سکے ہوں؟                     |  |  |  |  |  |
| ST4                                                                  | How often have you woken up several times and found it difficult to get back to sleep?<br>متعدد بار اٹھنا کتنی بار پیش آیا ہے اور دوبارہ سونے میں کتنی مشکل پیش آئی؟ |  |  |  |  |  |
| <b>Somatic Stress (SO):</b> اعصابی تناؤ/جسمانی عارضہ                 |                                                                                                                                                                      |  |  |  |  |  |
| These questions are about how you have been during the last 4 weeks. |                                                                                                                                                                      |  |  |  |  |  |
| یہ سوالات گزشتہ چار ہفتوں کے دورانیے میں آپ کی صحت کے حوالے سے ہیں۔  |                                                                                                                                                                      |  |  |  |  |  |
| SO1                                                                  | How often have you had stomachache?<br>آپ کو کتنی مرتبہ معدے میں درد محسوس ہوئی ہے؟                                                                                  |  |  |  |  |  |
| SO2                                                                  | How often have you had a headache?<br>آپ کو کتنی مرتبہ سر درد کا سامنا کرنا پڑا ہے؟                                                                                  |  |  |  |  |  |

|                                                                                                                                                                                    |                                                                                                                                                                   |  |  |  |  |  |
|------------------------------------------------------------------------------------------------------------------------------------------------------------------------------------|-------------------------------------------------------------------------------------------------------------------------------------------------------------------|--|--|--|--|--|
| SO3                                                                                                                                                                                | How often have you had palpitations?<br>آپ کو کتنی مرتبہ دل کی دھڑکن تیز ہونے کی تکلیف ہوئی ہے؟                                                                   |  |  |  |  |  |
| SO4                                                                                                                                                                                | How often have you had tension in various muscles?<br>آپ کتنی مرتبہ اعصابی تناؤ سے گزرے ہیں؟                                                                      |  |  |  |  |  |
| <p><b>Quality of Leadership (QL):</b> قائدانہ صلاحیت</p> <p>To what extent would you say that your immediate superior?</p> <p>آپ کہاں تک یہ کہہ سکتے ہیں کہ آپ کا موجودہ نگران</p> |                                                                                                                                                                   |  |  |  |  |  |
| QL1                                                                                                                                                                                | Makes sure that the members of staff have good development opportunities.<br>اپنے ساتھ کام کرنے والے (سٹاف ممبران) کے لیے ترقی کے مواقعوں کا حصول یقینی بناتا ہے۔ |  |  |  |  |  |
| QL2                                                                                                                                                                                | Gives high priority to job satisfaction.<br>اطمینان ملازمت کو اعلیٰ ترجیح دیتا ہے۔                                                                                |  |  |  |  |  |
| QL3                                                                                                                                                                                | Is good at work planning?<br>اس کی منصوبہ بندی درست ہے؟                                                                                                           |  |  |  |  |  |
| QL4                                                                                                                                                                                | Is good at solving conflicts?<br>تنازعات کے حل کرنے میں بہتر ہے؟                                                                                                  |  |  |  |  |  |
